# Supplementary material
Source: Springer Nature journal article supplement (https://www.springermedizin.de/resource/supplementary/12889_2008_1291_MOESM3_ESM.pdf/9502876)

### a. Outpatient clinical cases

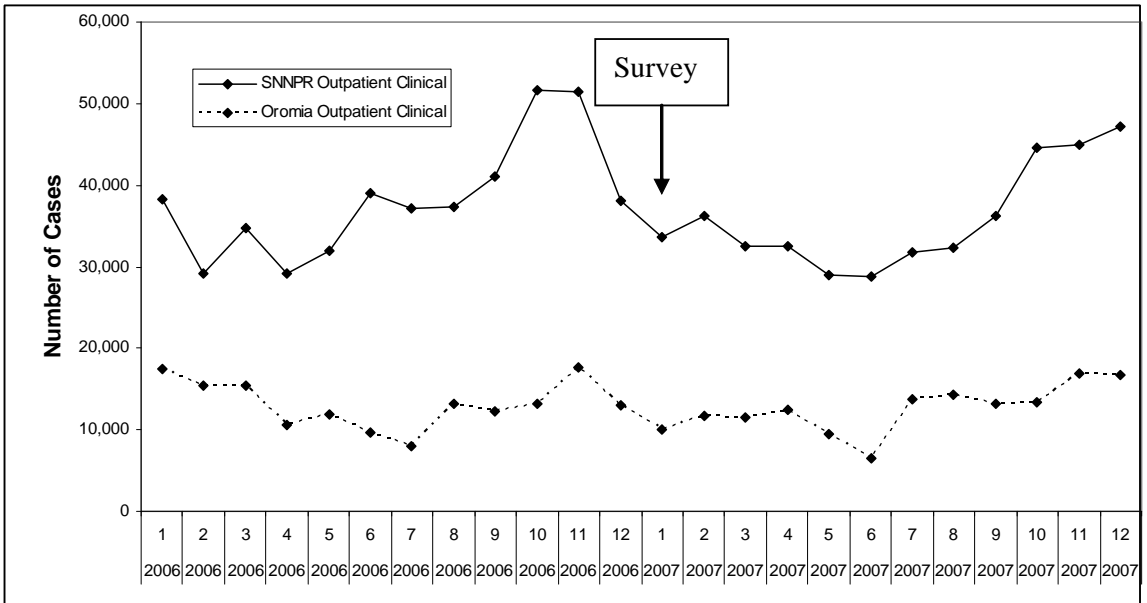

### b. Outpatient confirmed cases

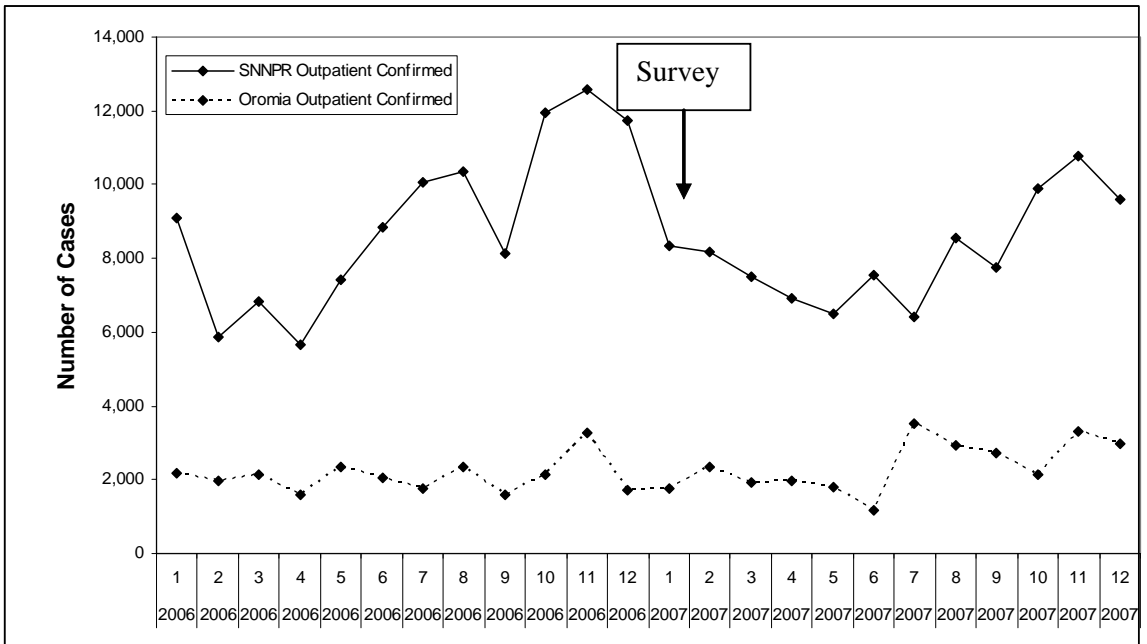

Supplement: MOESM3 [file 9502876]
